# Supplementary material for: Size- and shape-controlled synthesis of PbSe and PbS nanocrystalsvia a facile method
Source: Royal Society of Chemistry journal article supplement (doi:10.1039/b917833c), 2009-12-01
Supplement: b917833c.pdf [file b917833c.pdf]

## Supplementary Information

# Size- and Shape-Controlled Synthesis of PbSe and PbS Nanocrystals via a Facile Method

Hongbo Li,<sup>a,b</sup> Dong Chen,<sup>a</sup> Linlin Li,<sup>a</sup> Fangqiong Tang,<sup>a,\*</sup> Lin Zhang,<sup>a</sup> Jun Ren.<sup>a</sup>

<sup>a</sup> Technical Institute of Physics and Chemistry, Chinese Academy of Sciences

<sup>b</sup> Graduate University of the Chinese Academy of Sciences

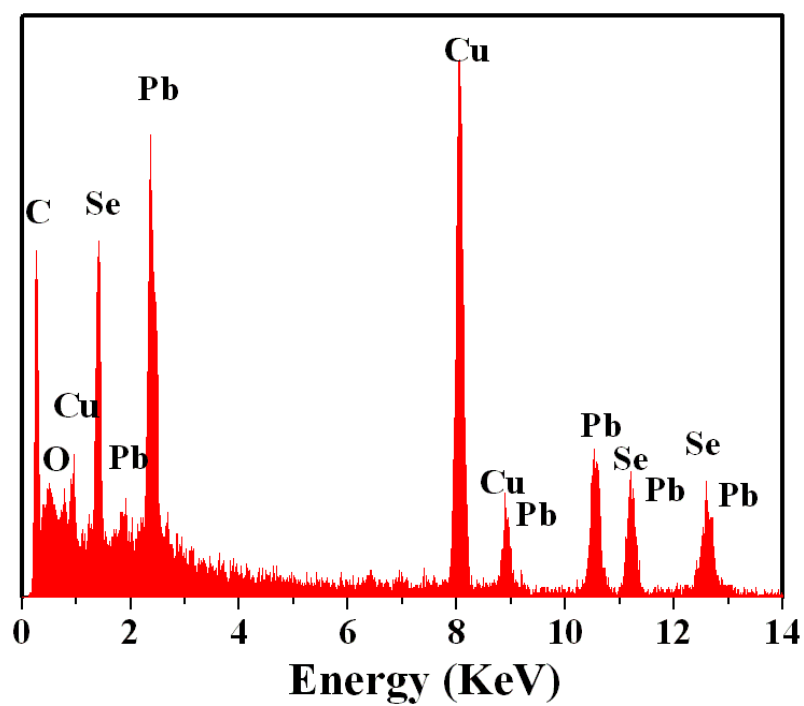

**Fig. S1** EDS spectrum of cubic PbSe nanocrystals shown in Figure 2.

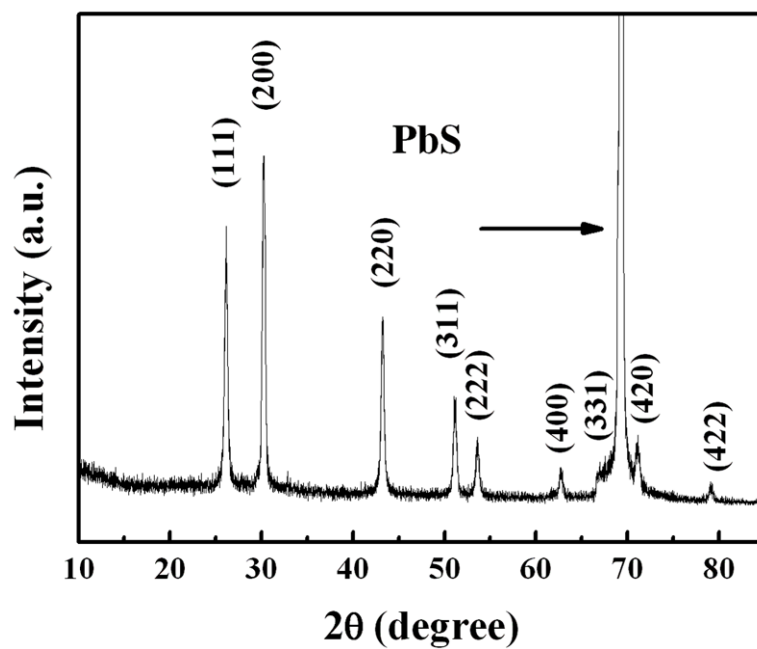

**Fig. S2** XRD pattern of the cubic PbS nanocrystals shown in Figure 6 c. Arrow indicated peak was from Si wafer.
